# Supplementary material
Source: PubMed Central journal article supplement (PMC6310076)
Supplement: NIHMS1511010-supplement-1.pdf [file NIHMS1511010-supplement-1.pdf]

## Supplementary Figure 1.

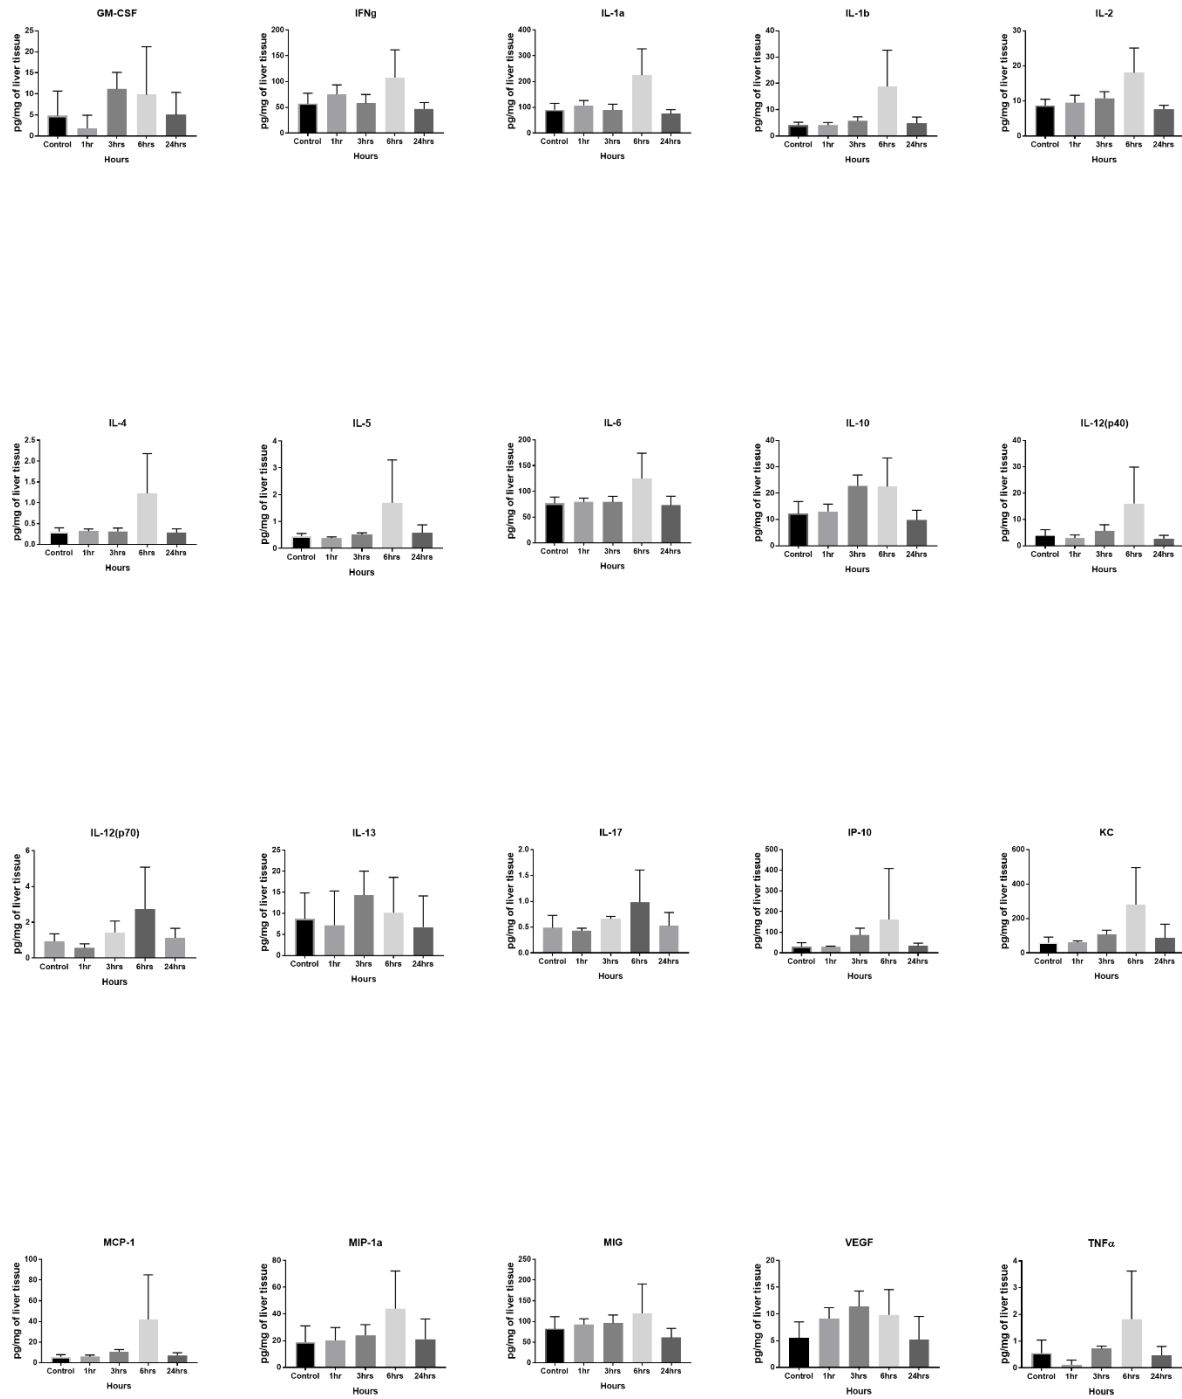

**Supplementary Fig.1.** The Luminex analysis showing levels of 20 inflammatory mediators after liver ischemia reperfusion at different time points.

## Supplementary Figure 2.

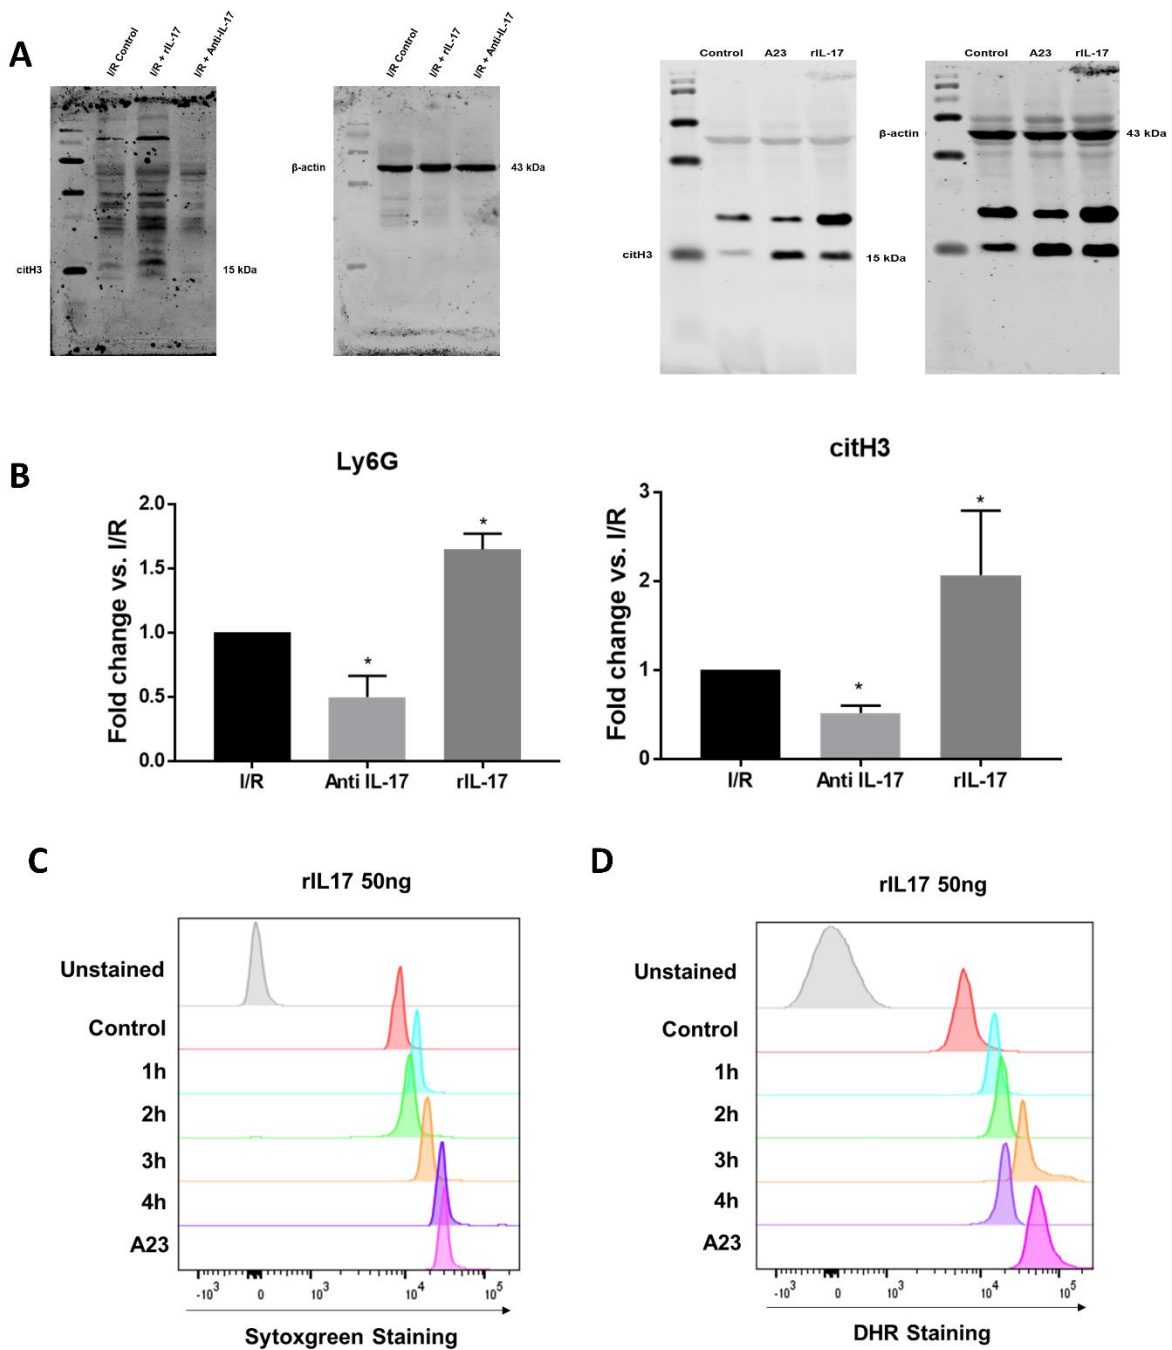

**Supplementary Fig.2.** (A) The complete representative images of the western blots (uncropped) shown in the main manuscript. (B) Bar graphs illustrating a significant decrease neutrophil infiltration (LY6G) and NET formation (citH3) in the ischemic lobe after treating with anti-IL-17 compared to the untreated ischemic lobe. However, treatment with rIL-17 significantly elevated the infiltration of neutrophils and NET formation. Flow cytometry analysis showing a time-dependent increase in the formation of NETs when treated with rIL-17 as evident by Sytoxgreen (C) and DHR (D) staining.

Supplementary Figure 3.

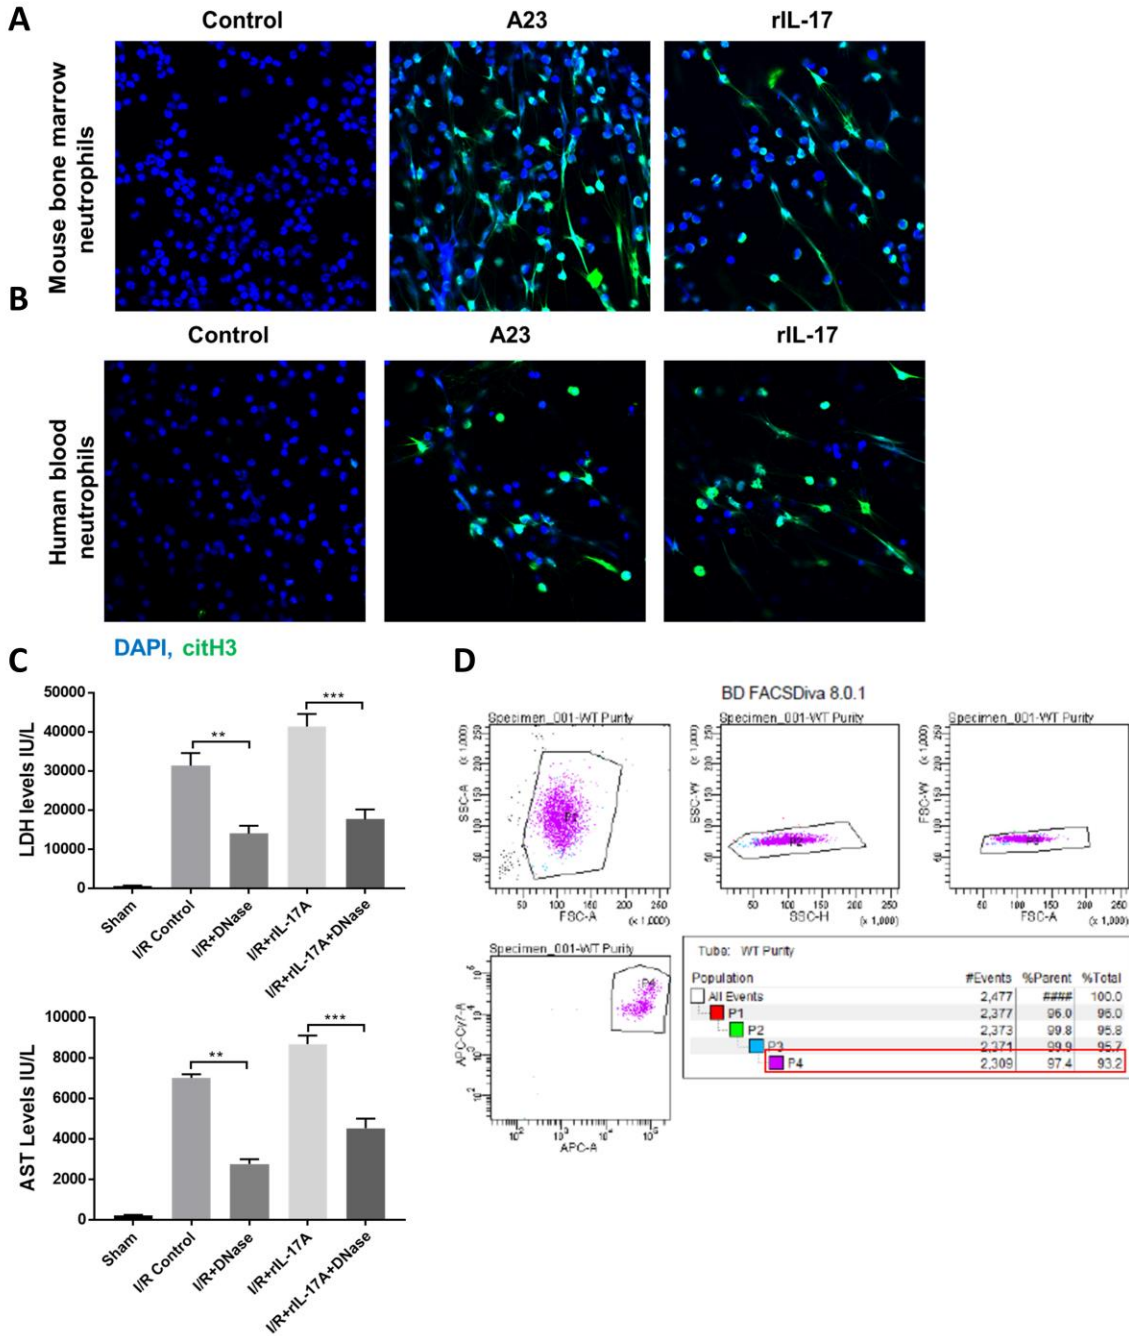

**Supplementary Fig.3.** Representative immunofluorescence images show increased citH3 expression when coculturing rIL-17 with the neutrophils isolated from bone marrow of mouse (A) and from the peripheral blood of human (B). Quantification analysis of serum AST and LDH levels (C) showed a significant decrease after the treatment with DNase compared to I/R control. Treatment with rIL-17 significantly elevated the liver injury and the addition of DNase showed a protective effect. (D) Flowcytometry analysis showing the purity of 97.4% of isolated neutrophils.

Supplementary Table <sup>1</sup>

| Cytokine     | 0-1hrs | 1-3hrs | 3-6hrs | 6-24hrs |
|--------------|--------|--------|--------|---------|
| VEGF         | 0      | 0      | 0      | 0       |
| TNF $\alpha$ | 1      | 5      | 9      | 9       |
| GM-CSF       | 4      | 3      | 0      | 0       |
| IFN $\gamma$ | 2      | 2      | 8      | 9       |
| IL-1a        | 1      | 2      | 10     | 11      |
| IL-1b        | 2      | 2      | 10     | 10      |
| IL-2         | 3      | 0      | 10     | 10      |
| IL-4         | 5      | 1      | 10     | 10      |
| IL-5         | 1      | 1      | 9      | 10      |
| IL-6         | 0      | 1      | 3      | 5       |
| IL-10        | 2      | 5      | 1      | 1       |
| IL-12(p40)   | 1      | 1      | 0      | 0       |
| IL-12(p70)   | 1      | 2      | 9      | 9       |
| IL-13        | 0      | 1      | 1      | 1       |
| IL-17        | 3      | 6      | 10     | 10      |
| IP-10        | 5      | 3      | 2      | 2       |
| KC           | 0      | 3      | 2      | 2       |
| MCP-1        | 0      | 5      | 4      | 6       |
| MIP-1a       | 3      | 0      | 9      | 9       |
| MIG          | 2      | 0      | 0      | 0       |

| Cytokine     | Anti-IL-17 given after reperfusion at time |         |         |       |
|--------------|--------------------------------------------|---------|---------|-------|
|              | 0 hours                                    | 2 hours | 4 hours | DNase |
| VEGF         | 0                                          | 11      | 10      | 4     |
| TNF $\alpha$ | 8                                          | 11      | 10      | 0     |
| GM-CSF       | 0                                          | 2       | 2       | 2     |
| IFN $\gamma$ | 2                                          | 9       | 9       | 0     |
| IL-1a        | 3                                          | 10      | 10      | 0     |
| IL-1b        | 3                                          | 12      | 11      | 1     |
| IL-2         | 2                                          | 9       | 9       | 3     |
| IL-4         | 5                                          | 9       | 9       | 5     |
| IL-5         | 2                                          | 1       | 0       | 3     |
| IL-6         | 3                                          | 9       | 9       | 0     |
| IL-10        | 3                                          | 10      | 10      | 0     |
| IL-12(p40)   | 4                                          | 1       | 1       | 0     |
| IL-12(p70)   | 2                                          | 1       | 0       | 4     |
| IL-13        | 6                                          | 10      | 10      | 1     |
| IL-17        | 3                                          | 2       | 3       | 4     |
| IP-10        | 0                                          | 5       | 5       | 1     |
| KC           | 3                                          | 0       | 0       | 0     |
| MCP-1        | 3                                          | 10      | 6       | 0     |
| MIP-1a       | 3                                          | 2       | 3       | 4     |
| MIG          | 0                                          | 0       | 1       | 0     |

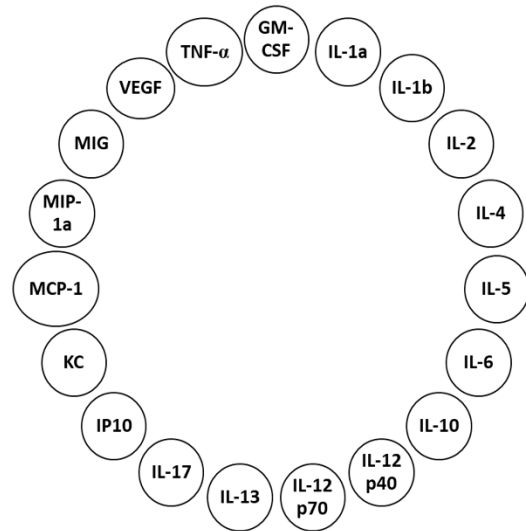

<sup>1</sup> Number of connections deduced from Dyna Analysis between various cytokines in control vs experimental mice
